# Supplementary material for: Diagnostic Accuracy of HemotypeSC as a Point-of-Care Testing Device for Sickle Cell Disease: Findings from a Southwestern State in Nigeria and Implications for Patient Care in Resource-Poor Settings of sub-Saharan Africa
Source: PubMed Central journal article supplement — Glob Pediatr Health. 2021 May 19;8:2333794X211016789. doi: 10.1177/2333794X211016789 (PMC8138286; doi:10.1177/2333794x211016789), 2021-05-19
Supplement: sj-pdf-1-gph-10.1177_2333794X211016789.pdf [file sj-pdf-1-gph-10.1177_2333794X211016789.pdf]

Diagnostic Accuracy of HemotypeSC as a Point-of-Care Testing Device for Sickle Cell Disease: Findings from a Southwestern State in Nigeria and Implications for Patient Care in Resource-Poor Settings of sub-Saharan Africa

**Supplement Table 1**

**Table 1a:**

Interrater agreement

Number of subjects = 145  
Ratings per subject = 3  
Number of rating categories = 5

|                                                     | Coefficient | Std. Err | t | P >  t | 95% confidence interval |        |
|-----------------------------------------------------|-------------|----------|---|--------|-------------------------|--------|
| Percent Agreement                                   | 1.0000      | 0.0000   | - | -      | 1.0000                  | 1.0000 |
| Brennan and Prediger                                | 1.0000      | 0.0000   | - | -      | 1.0000                  | 1.0000 |
| Cohen/Conger's Kappa                                | 1.0000      | 0.0000   | - | -      | 1.0000                  | 1.0000 |
| Scott/ Fleiss' Kappa                                | 1.0000      | 0.0000   | - | -      | 1.0000                  | 1.0000 |
| Gwet's AC                                           | 1.0000      | 0.0000   | - | -      | 1.0000                  | 1.0000 |
| Krippendorff's Alpha                                | 1.0000      | 0.0000   | - | -      | 1.0000                  | 1.0000 |
| Confidence intervals are clipped at the upper limit |             |          |   |        |                         |        |

**Table 1b:**

Interrater agreement

Number of subjects = 156  
Ratings per subject: min = 3  
                                  avg = 2.9295  
                                  max = 3  
Number of rating categories = 5

|                      | Coefficient | Std. Err | t | P >  t | [95% confidence interval] |        |
|----------------------|-------------|----------|---|--------|---------------------------|--------|
| Percent Agreement    | 1.0000      | 0.0000   | - | -      | 1.0000                    | 1.0000 |
| Brennan and Prediger | 1.0000      | 0.0000   | - | -      | 1.0000                    | 1.0000 |
| Cohen/Conger's Kappa | 1.0000      | 0.0000   | - | -      | 1.0000                    | 1.0000 |
| Scott/ Fleiss' Kappa | 1.0000      | 0.0000   | - | -      | 1.0000                    | 1.0000 |
| Gwet's AC            | 1.0000      | 0.0000   | - | -      | 1.0000                    | 1.0000 |
| Krippendorff's Alpha | 1.0000      | 0.0000   | - | -      | 1.0000                    | 1.0000 |

Confidence intervals are clipped at the upper limit
